# Supplementary material
Source: ML conference proceedings conference paper supplement (https://aclanthology.org/2026.americasnlp-6.12)
Supplement: SupplementaryMaterial [file annotation_pipeline.pdf › annotation_pipeline.pdf]

Sipas-**kuna**qa ñawraq llimp'i t'ikawan-**mi** chuku-**n-kuta** achala-**nku**

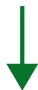

NUMBER:PL

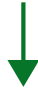

## EVID:ATT

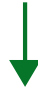

# POSS:3 PL

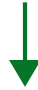

PERSON:3PL

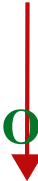

**TENSE:PRES\_SIM**

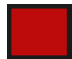

## Automatically inferred label

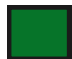

## Manually validated label
