# Supplementary material
Source: ML conference proceedings conference paper supplement (https://aclanthology.org/2026.americasnlp-6.12)
Supplement: SupplementaryMaterial [file figure1_corpus_pipeline.pdf › figure1_corpus_pipeline.pdf]

Source Documents

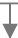

Text Extraction

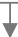

Text Cleaning &  
Normalization

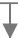

Sentence Segmentation

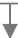

Heuristic Sentence  
Alignment

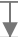

Parallel Spanish–Quechua  
Corpus
