# Supplementary material
Source: ML conference proceedings conference paper supplement (https://aclanthology.org/2026.americasnlp-6.12)
Supplement: SupplementaryMaterial [file figure2_dataset_pipeline.pdf › figure2_dataset_pipeline.pdf]

Parallel Spanish–Quechua  
Corpus

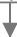

Morphosyntactic Annotation

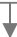

Transformation Pair  
Generation

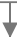

Change Extraction

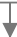

Morphosyntactic  
Transformation Dataset
