# Supplementary material
Source: ML conference proceedings conference paper supplement (https://aclanthology.org/2026.americasnlp-6.12)
Supplement: SupplementaryMaterial [file figure_kshot_selection.pdf › figure_kshot_selection.pdf]

Target instance  
(Source, Change)

[Level 1] Exact change

(if K not reached)

[Level 2] Primary change

(if K not reached)

[Level 3] Similarity

apply constraints

- Subset constraint
  - Cluster-first
  - Leave-one-out

Final set of K examples
