# Supplementary material
Source: ML conference proceedings conference paper supplement (https://aclanthology.org/2026.americasnlp-6.12)

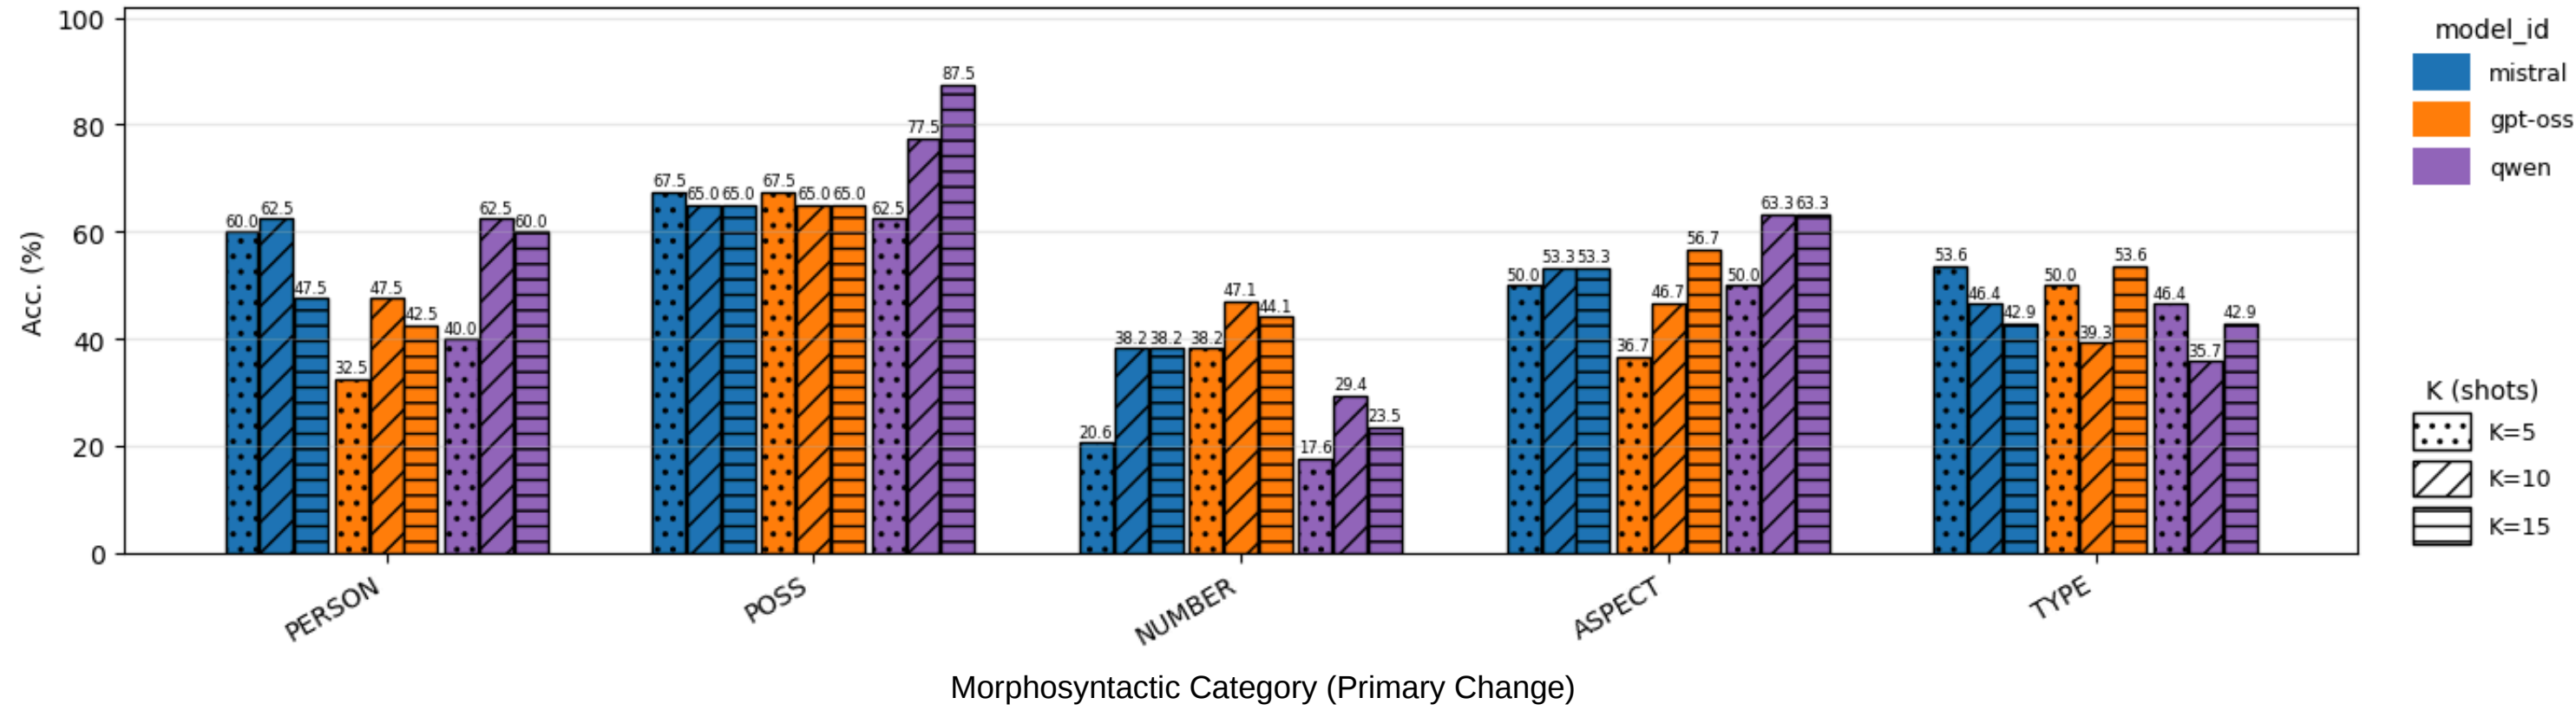

Supplement: SupplementaryMaterial [file category_accuracy.pdf › category_accuracy.pdf]

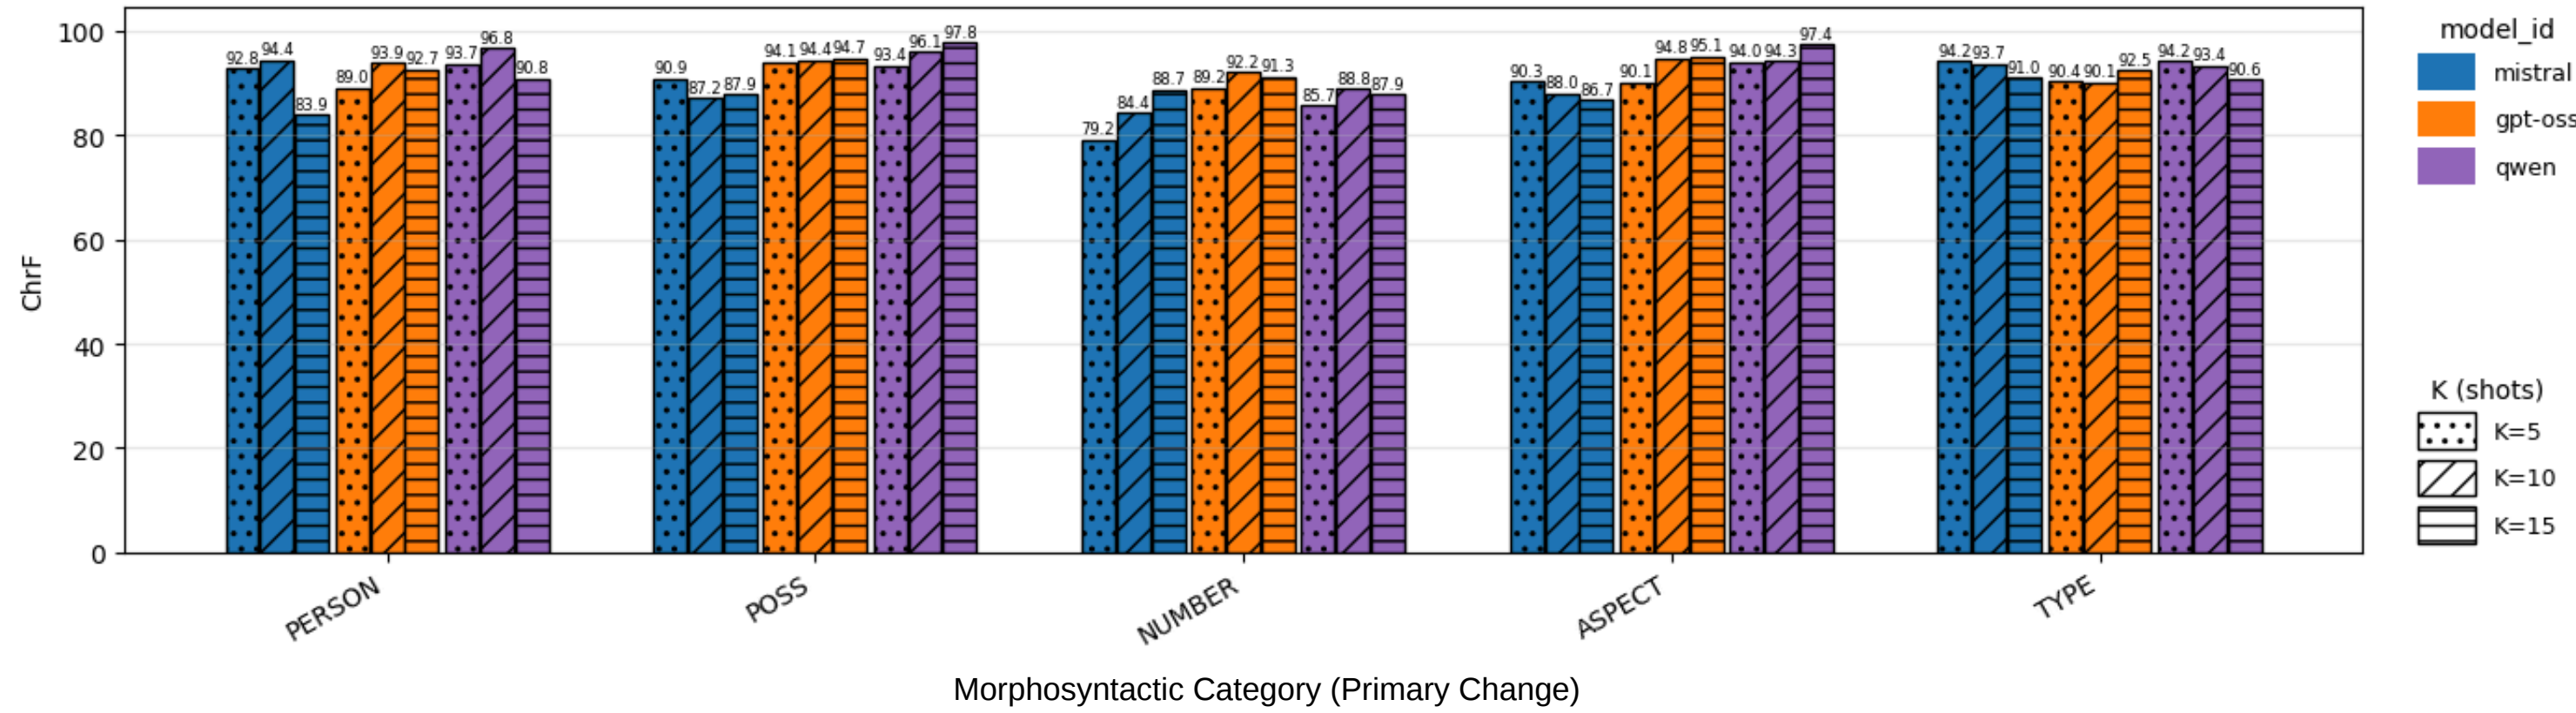

Supplement: SupplementaryMaterial [file category_chrf.pdf › category_chrf.pdf]

Latency (ms) vs K — Size = 1

hints=0

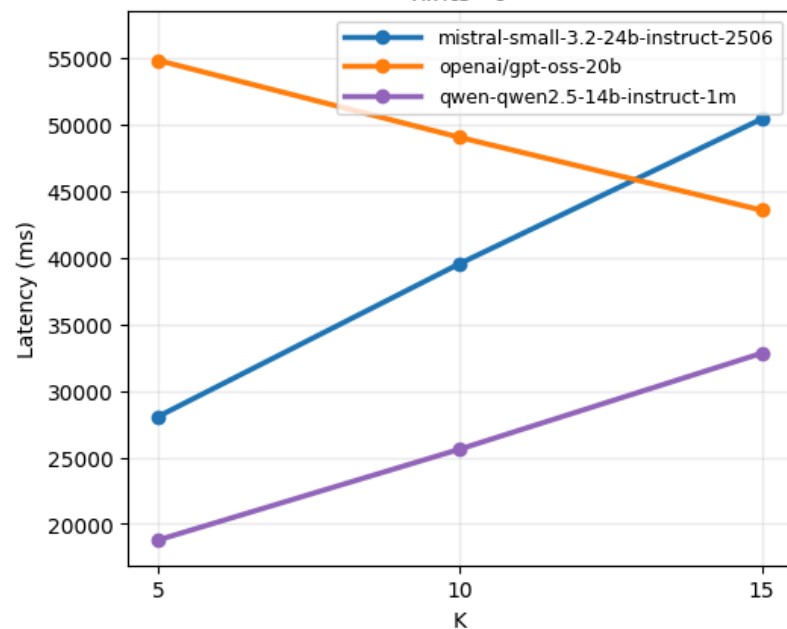

hints=1

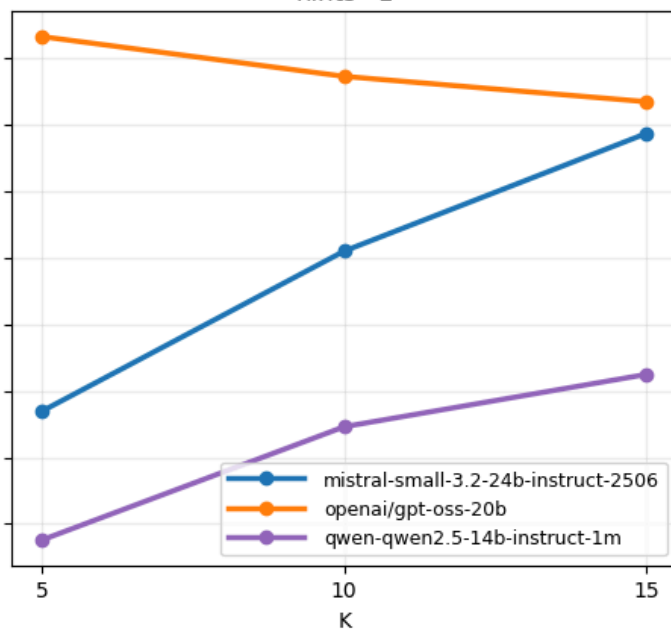

Latency (ms) vs K — Size = 2

hints=0

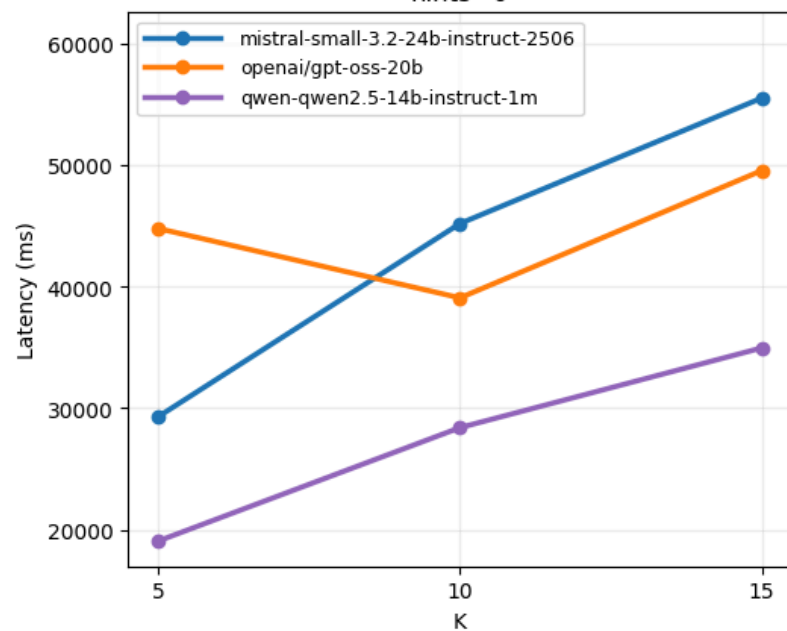

hints=1

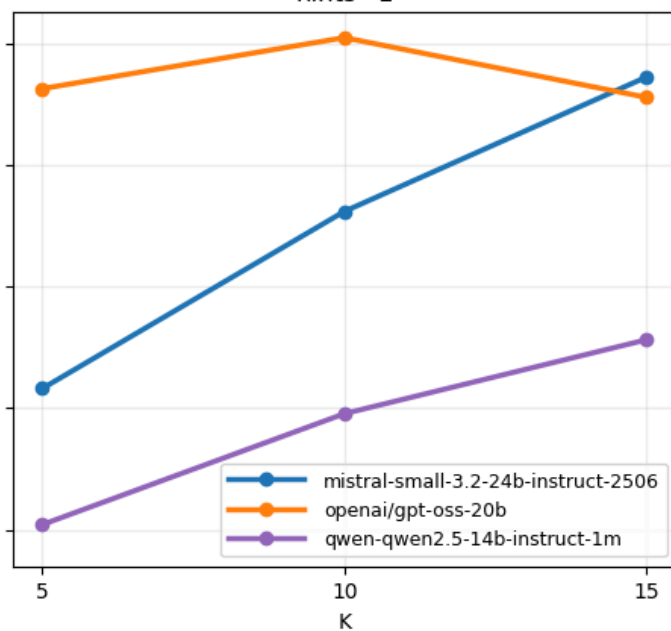

Supplement: SupplementaryMaterial [file figure_latency_k.pdf › figure_latency_k.pdf]
